# Supplementary material for: African Ancestry Proportion Influences Ileal Gene Expression in Inflammatory Bowel Disease
Source: PubMed Central journal article supplement (PMC7296223; doi:10.1016/j.jcmgh.2020.02.001), 2020-02-10
Supplement: mmc1.pdf [file mmc1.pdf]

## Supplementary Table 1. GSEA Enrichment Scores

| NAME                                       | ES <sup>1</sup> | NES <sup>2</sup> | NOM p-val   | FDR q-val  |
|--------------------------------------------|-----------------|------------------|-------------|------------|
| HALLMARK_MITOTIC_SPINDLE                   | -0.96953654     | -2.738665        | 0.036809817 | 0.24540035 |
| HALLMARK_TNFA_SIGNALING_VIA_NFKB           | -0.78459835     | -2.131841        | 0.061099797 | 1          |
| HALLMARK_EPITHELIAL_MESENCHYMAL_TRANSITION | -0.7627758      | -2.1261334       | 0.064718165 | 0.6822187  |
| HALLMARK_INTERFERON_GAMMA_RESPONSE         | -0.75405574     | -2.0704424       | 0.06290673  | 0.5373365  |
| HALLMARK_XENOBIOTIC_METABOLISM             | 0.7114698       | 1.7093651        | 0.14814815  | 0.8671167  |
| HALLMARK_ANGIOGENESIS                      | -0.7054058      | -1.7550359       | 0.047528517 | 0.33538553 |
| HALLMARK_ESTROGEN_RESPONSE_EARLY           | 0.70333433      | 1.7096115        | 0.14570858  | 1          |
| HALLMARK_COMPLEMENT                        | -0.6963707      | -1.8607478       | 0.08898305  | 0.5260123  |
| HALLMARK_ESTROGEN_RESPONSE_LATE            | 0.69636387      | 1.6763769        | 0.13644859  | 0.6136178  |
| HALLMARK_OXIDATIVE_PHOSPHORYLATION         | 0.68012977      | 1.6174641        | 0.17375231  | 0.51181173 |
| HALLMARK_KRAS_SIGNALING_UP                 | -0.6740996      | -1.8120219       | 0.09544469  | 0.46603143 |
| HALLMARK_INFLAMMATORY_RESPONSE             | -0.66156536     | -1.8029977       | 0.10107527  | 0.4036422  |
| HALLMARK_HYPOXIA                           | -0.6506489      | -1.7506601       | 0.11594203  | 0.3033227  |
| HALLMARK_INTERFERON_ALPHA_RESPONSE         | -0.6433157      | -1.8028818       | 0.057539683 | 0.35318694 |
| HALLMARK_MYC_TARGETS_V1                    | -0.63430864     | -1.6890604       | 0.12035011  | 0.30162588 |
| HALLMARK_IL6_JAK_STAT3_SIGNALING           | -0.6031751      | -1.66111         | 0.06584362  | 0.28307122 |
| HALLMARK_SPERMATOGENESIS                   | -0.5676277      | -1.557379        | 0.061099797 | 0.28568843 |
| HALLMARK_HEDGEHOG_SIGNALING                | -0.5453301      | -1.3602403       | 0.13793103  | 0.29140854 |
| HALLMARK_APOPTOSIS                         | -0.5123841      | -1.419991        | 0.111561865 | 0.30515093 |
| HALLMARK_PANCREAS_BETA_CELLS               | 0.50091386      | 1.2124683        | 0.23517382  | 0.6139624  |
| HALLMARK_GLYCOLYSIS                        | 0.5003059       | 1.1435319        | 0.256654    | 0.48104674 |
| HALLMARK_MYOGENESIS                        | -0.4992916      | -1.3265461       | 0.14197531  | 0.27315947 |
| HALLMARK_ALLOGRAFT_REJECTION               | -0.49219608     | -1.3456522       | 0.12778905  | 0.28104284 |
| HALLMARK_UV_RESPONSE_DN                    | -0.4788568      | -1.3921219       | 0.09381663  | 0.29563344 |
| HALLMARK_IL2_STAT5_SIGNALING               | -0.4648526      | -1.2194562       | 0.1826087   | 0.32190385 |
| HALLMARK_PEROXISOME                        | 0.45880708      | 1.1639911        | 0.21142857  | 0.5433961  |
| HALLMARK_ADIPOGENESIS                      | 0.42392758      | 1.0107353        | 0.29338843  | 0.5345546  |
| HALLMARK_G2M_CHECKPOINT                    | -0.42264763     | -1.1181176       | 0.18828452  | 0.39563367 |
| HALLMARK_NOTCH_SIGNALING                   | -0.41112712     | -1.0035685       | 0.41614908  | 0.5054806  |
| HALLMARK_TGF_BETA_SIGNALING                | -0.38988957     | -1.0531788       | 0.34435797  | 0.45401844 |
| HALLMARK_BILE_ACID_METABOLISM              | 0.37280008      | 0.92135537       | 0.38345864  | 0.5846342  |
| HALLMARK_COAGULATION                       | -0.35666084     | -0.96529174      | 0.36305732  | 0.55080724 |
| HALLMARK_P53_PATHWAY                       | -0.35356408     | -0.9617617       | 0.28817204  | 0.5333001  |
| HALLMARK_E2F_TARGETS                       | -0.3495585      | -0.89524615      | 0.31905782  | 0.5649946  |
| HALLMARK_FATTY_ACID_METABOLISM             | 0.3491053       | 0.86028254       | 0.4208494   | 0.6140024  |
| HALLMARK_PI3K_AKT_MTOR_SIGNALING           | -0.34672815     | -0.9346718       | 0.4032258   | 0.5377159  |
| HALLMARK_APICAL_SURFACE                    | -0.34615594     | -0.9051891       | 0.53373015  | 0.5665438  |
| HALLMARK_CHOLESTEROL_HOMEOSTASIS           | -0.34555647     | -0.9500684       | 0.43452382  | 0.5313629  |
| HALLMARK_ANDROGEN_RESPONSE                 | 0.31548336      | 0.7782141        | 0.5708333   | 0.7003621  |
| HALLMARK_REACTIVE_OXIGEN_SPECIES_PATHWAY   | -0.3002477      | -0.81362534      | 0.6687631   | 0.70644766 |
| HALLMARK_WNT_BETA_CATENIN_SIGNALING        | -0.29808396     | -0.766772        | 0.7231076   | 0.73594713 |

|                                    |             |             |            |            |
|------------------------------------|-------------|-------------|------------|------------|
| HALLMARK_PROTEIN_SECRETION         | 0.29019544  | 0.6923406   | 0.65957445 | 0.80639565 |
| HALLMARK_MYC_TARGETS_V2            | -0.28258362 | -0.77286494 | 0.69753087 | 0.74765736 |
| HALLMARK_DNA_REPAIR                | -0.27484703 | -0.77776295 | 0.6492693  | 0.7620492  |
| HALLMARK_UV_RESPONSE_UP            | -0.26478726 | -0.7135497  | 0.73100615 | 0.8207212  |
| HALLMARK_MTORC1_SIGNALING          | -0.25699028 | -0.6710301  | 0.7731481  | 0.87532324 |
| HALLMARK_KRAS_SIGNALING_DN         | 0.25573143  | 0.64437884  | 0.83943087 | 0.83299124 |
| HALLMARK_APICAL_JUNCTION           | -0.23773567 | -0.65685195 | 0.8586724  | 0.87192327 |
| HALLMARK_UNFOLDED_PROTEIN_RESPONSE | 0.22921126  | 0.56387246  | 0.8996139  | 0.90224123 |
| HALLMARK_HEME_METABOLISM           | -0.22914925 | -0.6322403  | 0.8836689  | 0.88378996 |

<sup>1</sup>Enrichment Score: Degree to which gene set is overrepresented at the top of bottom of the ranked list of genes.

<sup>2</sup>Normalized Enrichment Score: Enrichment score divided by the mean of enrichment scores against all permutations of the ranked list.

#### Supplemental Table 2. Ancestry Proportion Permutation Test Summary Statistics

| <b>Statistic</b>                               | <b>Value</b> |
|------------------------------------------------|--------------|
| Minimum                                        | -0.619       |
| 1st Quartile                                   | -0.227       |
| Median                                         | 0.013        |
| Mean                                           | -0.005       |
| 3rd Quartile                                   | 0.210        |
| Maximum                                        | 0.567        |
| <b>P Value of True Correlation<sup>1</sup></b> | <b>0.05</b>  |

<sup>1</sup>Based on the ranking of true correlation ( $c = 0.43$ ) out of 1000 permutation tests.

## Supplemental Figure 1. Case-Control, Disease Subtype, and Medication

### Associations with DEGs

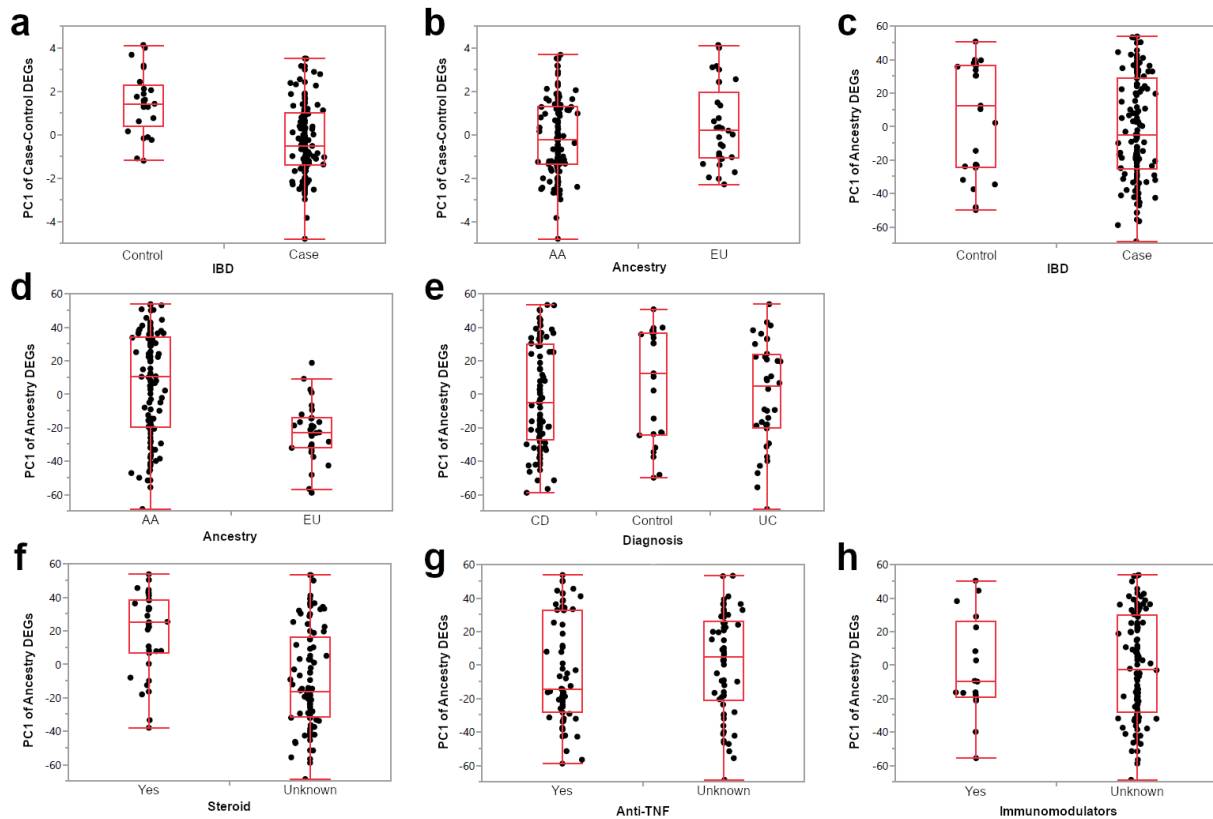

**(a)** First principal component (PC1) of genes differentially expressed between IBD cases and controls.  $P = 1.42 \times 10^{-6}$  **(b)** PC1 of case-control DEGs in AA and European individuals.  $P = 0.15$  **(c)** PC1 of genes differentially expressed between AA and European IBD patients in IBD cases and controls.  $P = 0.27$  **(d)** First principal component of genes differentially expressed between AA and European IBD patients.  $P = 1.38 \times 10^{-6}$  **(e)** PC1 of ancestry-related DEGs in controls and subtypes of IBD.  $P = 0.54$  **(f)** PC1 of ancestry-related DEGs in patients known to be treated with steroids.  $P = 9.22 \times 10^{-6}$ ; note that only AA patients received steroids **(g)** PC1 of ancestry-related DEGs in patients known to be treated with anti-TNF.  $P = 0.44$  **(h)** PC1 of ancestry-related DEGs in patients known to be treated with immunomodulators.  $P = 0.94$
